# Supplementary material for: Epidermal threads reveal the origin of hagfish slime
Source: eLife. 2023 Mar 10;12:e81405. doi: 10.7554/eLife.81405 (PMC10005773; doi:10.7554/eLife.81405)
Supplement: Figure 2—source data 1. [file elife-81405-fig2-data1.xlsx]

## Sheet: Sheet1
		<Fig. 2-S1B,C	Slide	Section	Cell type	Cell density (mm^-1)	Position relative to dorsal	Relative position group				<Fig. 2-S1D	Hagfish	Position	Sample	Cell	Area density (mm-^-2)
			2	1	LMC	15.0067	0.0754016	(0,0.25]					1	A	1	SMC	6718.23
			2	1	ETC	20.5355	0.0754016	(0,0.25]					1	A	2	SMC	4934.22
			2	2	SMC	517.408	0.0615681	(0,0.25]					1	B	1	SMC	12429.7
			2	3	LMC	11.518	0.482733	(0.25,0.75]					1	B	2	SMC	11893.1
			2	3	ETC	36.1994	0.482733	(0.25,0.75]					1	C	1	SMC	7715.13
			2	4	SMC	1144.48	0.468469	(0.25,0.75]					1	C	2	SMC	9445.88
			2	5	LMC	16.2561	0.9015	(0.75,1]					2	A	1	SMC	10751.7
			2	5	ETC	30.0113	0.9015	(0.75,1]					2	A	2	SMC	8819.68
			2	6	SMC	1446.28	0.892004	(0.75,1]					2	B	1	SMC	14981.3
			3	1	LMC	18.7495	0.0618348	(0,0.25]					2	B	2	SMC	15771.5
			3	1	ETC	16.4058	0.0618348	(0,0.25]					2	C	1	SMC	8842.34
			3	2	SMC	434.625	0.0537415	(0,0.25]					2	C	2	SMC	11086.9
			3	3	LMC	11.3829	0.557904	(0.25,0.75]					1	A	1	ETC	1040.34
			3	3	ETC	19.6614	0.557904	(0.25,0.75]					1	A	2	ETC	929.666
			3	4	SMC	809.827	0.548775	(0.25,0.75]					1	B	1	ETC	1372.36
			3	5	LMC	6.5033	0.952646	(0.75,1]					1	B	2	ETC	1350.23
			3	5	ETC	15.9627	0.952646	(0.75,1]					1	C	1	ETC	1195.29
			3	6	SMC	878.461	0.933877	(0.75,1]					1	C	2	ETC	1261.69
			4	1	LMC	19.1388	0.0814159	(0,0.25]					2	A	1	ETC	730.452
			4	1	ETC	18.0755	0.0814159	(0,0.25]					2	A	2	ETC	1261.69
			4	2	SMC	489.51	0.0715798	(0,0.25]					2	B	1	ETC	1151.02
			4	3	LMC	9.05797	0.50312	(0.25,0.75]					2	B	2	ETC	1018.21
			4	3	ETC	18.9394	0.50312	(0.25,0.75]					2	C	1	ETC	1460.9
			4	4	SMC	445.269	0.490137	(0.25,0.75]					2	C	2	ETC	1350.23
			4	5	LMC	8.16994	0.903158	(0.75,1]
			4	5	ETC	16.3399	0.903158	(0.75,1]
			4	6	SMC	137.457	0.894448	(0.75,1]
			5	1	LMC	12.4344	0.0513162	(0,0.25]
			5	1	ETC	19.3424	0.0513162	(0,0.25]
			5	2	SMC	654.102	0.0431555	(0,0.25]
			5	3	LMC	8.97868	0.493936	(0.25,0.75]
			5	3	ETC	26.1878	0.493936	(0.25,0.75]
			5	4	SMC	727.273	0.477714	(0.25,0.75]
			5	5	LMC	11.7113	0.943371	(0.75,1]
			5	5	ETC	16.1031	0.943371	(0.75,1]
			5	6	SMC	246.583	0.938908	(0.75,1]
			6	1	LMC	13.1803	0.0596894	(0,0.25]
			6	1	ETC	15.377	0.0596894	(0,0.25]
			6	2	SMC	467.639	0.0505012	(0,0.25]
			6	3	LMC	9.49354	0.407523	(0.25,0.75]
			6	3	ETC	39.029	0.407523	(0.25,0.75]
			6	4	SMC	1063.48	0.396921	(0.25,0.75]
			6	5	LMC	7.16553	0.8417	(0.75,1]
			6	5	ETC	11.1464	0.8417	(0.75,1]
			6	6	SMC	1073.17	0.82692	(0.75,1]
			7	1	LMC	12.005	0.0713247	(0,0.25]
			7	1	ETC	9.604	0.0713247	(0,0.25]
			7	2	SMC	353.773	0.0633009	(0,0.25]
			7	3	LMC	7.09363	0.486433	(0.25,0.75]
			7	3	ETC	19.8622	0.486433	(0.25,0.75]
			7	4	SMC	672.267	0.478305	(0.25,0.75]
			7	5	LMC	8.3782	0.889691	(0.75,1]
			7	5	ETC	18.1528	0.889691	(0.75,1]
			7	6	SMC	535.78	0.882998	(0.75,1]
			8	1	LMC	5.42976	0.108794	(0,0.25]
			8	1	ETC	12.217	0.108794	(0,0.25]
			8	2	SMC	322.518	0.101496	(0,0.25]
			8	3	LMC	4.85216	0.505153	(0.25,0.75]
			8	3	ETC	23.2904	0.505153	(0.25,0.75]
			8	4	SMC	664.181	0.490165	(0.25,0.75]
			8	5	LMC	2.73123	0.964526	(0.75,1]
			8	5	ETC	21.8499	0.964526	(0.75,1]
			8	6	SMC	539.422	0.955514	(0.75,1]
			9	1	LMC	1.00843	0.0504106	(0,0.25]
			9	1	ETC	26.2192	0.0504106	(0,0.25]
			9	2	SMC	672.98	0.0384325	(0,0.25]
			9	3	LMC	5.95547	0.41291	(0.25,0.75]
			9	3	ETC	34.5417	0.41291	(0.25,0.75]
			9	4	SMC	908.229	0.402095	(0.25,0.75]
			9	5	LMC	4.12923	0.890609	(0.75,1]
			9	5	ETC	15.1405	0.890609	(0.75,1]
			9	6	SMC	557.747	0.883536	(0.75,1]
