# Supplementary material for: Epidermal threads reveal the origin of hagfish slime
Source: eLife. 2023 Mar 10;12:e81405. doi: 10.7554/eLife.81405 (PMC10005773; doi:10.7554/eLife.81405)
Supplement: Figure 3—source data 1. [file elife-81405-fig3-data1.xlsx]

## Sheet: Sheet1
		cell_ID	section_ID	diameter_mean	diameter_SD	pitch_mean	pitch_SD	helical_diameter_mean	helical_diameter_SD	pitch_to_radius_ratio
length unit: micrometer		ETC10	3	0.237991	0.0248221	54.0843	3.94288	0.479081	0.0946709	2.7613
		ETC10	4	0.514548	0.0395794	60.5482	2.38008	0.334504	0.0545537	3.54194
		ETC11	1	0.41782	0.122687	62.873	10.2268	0.320826	0.131689	3.90381
		ETC11	2	0.572444	0.138236	56.9795	2.89057	0.472264	0.0170442	3.07732
		ETC11	3	0.213538	0.0329572	72.5159	10.3216	0.196451	0.139287	6.34934
		ETC11	4	0.363504	0.0760948	54.4084	7.87887	0.586939	0.105658	2.79444
		ETC11	5	0.391764	0.0341649	63.3699	6.77112	0.498221	0.260582	3.98868
		ETC11	6	0.553667	0.0216568	75.0559	8.368	0.169739	0.0890125	7.49334
		ETC11	7	0.442759	0.0655302	71.5149	5.86731	0.288071	0.130409	5.98256
		ETC11	8	0.46324	0.0794512	68.3486	4.1755	0.353161	0.129271	5.03821
		ETC11	9	0.487655	0.0736026	71.7905	8.59585	0.230894	0.109542	6.07965
		ETC11	10	0.410344	0.0691218	71.8074	9.93262	0.239329	0.141073	6.08567
		ETC11	11	0.520463	0.0267226	76.006	2.42044	0.188965	0.0249088	8.02512
		ETC11	12	0.60407	0.124975	70.2545	14.5086	0.285761	0.20336	5.57185
		ETC11	13	0.320408	0.0453241	61.5933	9.56615	0.528845	0.260024	3.69789
		ETC12	1	0.373252	0.0593346	60.7864	3.90388	0.364513	0.0611646	3.57659
		ETC12	2	0.984614	0.218064	67.9778	2.70714	0.315395	0.0689289	4.94465
		ETC12	3	0.387141	0.0373329	59.2147	9.14569	0.412219	0.143534	3.35699
		ETC12	4	0.840566	0.0272785	69.7198	4.23467	0.311984	0.094222	5.41245
		ETC12	5	0.282845	0.0349525	57.2186	8.75136	0.473058	0.124243	3.1056
		ETC12	6	0.968482	0.0750089	69.8851	2.42019	0.205349	0.0353296	5.46086
		ETC12	7	0.920823	0.132674	67.0753	2.59661	0.261068	0.0189111	4.72897
		ETC12	8	0.311126	0.0208113	68.3456	2.0568	0.299785	0.0105758	5.03745
		ETC12	9	0.492141	0.0482889	71.695	2.32442	0.21092	0.0147203	6.04566
		ETC12	10	0.347343	0.0468202	65.9349	6.23799	0.267533	0.0699225	4.47837
		ETC12	11	0.335363	0.0484725	56.7978	7.93434	0.404241	0.105977	3.05606
		ETC12	12	0.344763	0.0548437	66.6894	4.51579	0.432356	0.109191	4.64159
		ETC12	13	0.368802	0.0298803	67.7366	3.66555	0.267313	0.0727471	4.88538
		ETC12	14	0.861261	0.102005	62.3127	4.79572	0.363603	0.0502582	3.81149
		ETC12	15	0.66744	0.0711425	60.217	2.07732	0.357873	0.0654876	3.49461
		ETC12	16	1.04826	0.117739	61.1701	11.229	0.375847	0.153993	3.6335
		ETC12	17	0.374698	0.0760764	65.3183	6.05059	0.212213	0.0539778	4.35197
		ETC13	1	0.66497	0.108074	56.8313	1.76105	0.443639	0.0538153	3.05997
		ETC13	2	0.430152	0.0516538	65.8859	3.3433	0.237491	0.0680742	4.4681
		ETC13	3	0.288154	0.0346813	61.1303	1.7672	0.340613	0.0246386	3.62753
		ETC13	4	0.803909	0.124609	59.1154	2.33622	0.430848	0.0368473	3.3438
		ETC13	5	0.763812	0.129082	67.1377	8.55463	0.236674	0.0932607	4.74336
		ETC13	6	1.00604	0.231923	66.8278	4.24863	0.26596	0.0354501	4.67262
		ETC13	7	0.400747	0.0601613	61.7652	8.51785	0.296509	0.113191	3.72454
		ETC13	8	0.791912	0.127178	71.5907	6.22985	0.182594	0.0623628	6.00896
		ETC13	9	0.625916	0.110861	58.5063	2.67235	0.284258	0.044623	3.26451
		ETC14	1	0.632555	0.0951814	66.0813	6.13117	0.365874	0.091369	4.50928
		ETC14	2	0.472979	0.106579	59.5642	2.74592	0.414734	0.0396525	3.40404
		ETC14	3	0.375476	0.0417245	65.5342	3.66813	0.298976	0.0321949	4.39555
		ETC14	4	0.610713	0.0722218	63.6634	1.48582	0.409253	0.0559453	4.04019
		ETC14	5	0.317842	0.0713367	70.7662	3.27565	0.264753	0.00975002	5.73232
		ETC14	6	0.47484	0.0342355	65.9068	1.06382	0.206858	0.0134579	4.47247
		ETC14	7	0.54957	0.0383855	76.019	11.0555	0.134984	0.109238	8.03291
		ETC14	8	0.597355	0.0728529	68.2847	6.321	0.284543	0.0481922	5.02188
		ETC14	9	0.443878	0.0754926	67.0922	1.30682	0.347426	0.0676219	4.73286
		ETC14	10	0.43459	0.128849	62.336	8.14051	0.430083	0.032071	3.81527
		ETC14	11	0.617491	0.146914	57.9704	1.33195	0.469503	0.122436	3.19699
		ETC14	12	0.362453	0.0456392	59.1113	10.0067	0.473081	0.135839	3.34325
		ETC14	13	0.48326	0.0345807	67.7998	1.77338	0.222242	0.0431469	4.90081
		ETC14	14	0.42224	0.10063	62.4776	10.0431	0.353163	0.137069	3.83831
		ETC15	1	0.554156	0.0447798	62.077	3.94228	0.538633	0.0445841	3.77367
		ETC15	2	0.582447	0.099738	66.2477	6.58089	0.378407	0.163741	4.54485
		ETC15	3	0.28127	0.0800432	68.223	8.68125	0.26821	0.175916	5.00618
		ETC15	4	0.296283	0.0418395	58.0467	15.8744	0.434946	0.228358	3.20648
		ETC15	5	0.252681	0.0319371	62.3816	8.99432	0.342298	0.139178	3.82266
		ETC15	6	0.324499	0.039239	62.3027	5.38354	0.268741	0.0438943	3.80987
		ETC15	7	0.274514	0.0400246	58.0038	3.00919	0.403631	0.0569992	3.20115
		ETC15	8	0.297906	0.0746746	61.3913	7.5827	0.246699	0.0991344	3.66694
		ETC15	9	0.27411	0.0343334	63.321	4.7002	0.3663	0.147478	3.98019
		ETC15	10	0.248054	0.0616948	66.9753	5.16751	0.268964	0.0420251	4.70606
		ETC15	11	0.311503	0.0717633	53.6752	8.27681	0.50549	0.11475	2.7202
		ETC15	12	0.309883	0.0804117	53.6901	2.58322	0.545353	0.073191	2.72169
		ETC15	13	0.239271	0.0556067	66.9857	2.11296	0.315163	0.0149485	4.70843
		ETC17	1	0.533116	0.0764737	65.9783	7.35907	0.300515	0.164035	4.48749
		ETC17	2	0.551808	0.0682665	59.6434	9.05503	0.428925	0.156899	3.41484
		ETC17	3	0.541533	0.0780918	59.9001	2.80606	0.459119	0.0543255	3.45019
		ETC17	4	0.572277	0.0414218	61.0312	1.47962	0.394412	0.0354632	3.61274
		ETC17	5	0.345863	0.0326673	67.4856	2.09035	0.242216	0.0341247	4.825
		ETC17	6	0.54008	0.0883488	58.9112	2.39063	0.464812	0.0497252	3.31691
		ETC17	7	0.566979	0.0543828	60.7856	5.47794	0.377386	0.079885	3.57647
		ETC17	8	0.590265	0.0897176	62.5872	3.7517	0.315061	0.0612472	3.85628
		ETC17	9	0.633926	0.100925	59.5732	9.82732	0.435504	0.189094	3.40526
		ETC17	10	0.316604	0.0490461	66.9974	1.83379	0.256826	0.0405019	4.71111
		ETC17	11	0.492542	0.0488765	60.3323	4.74266	0.448487	0.0829932	3.51098
		ETC17	12	0.561281	0.0698919	58.3994	3.16072	0.428629	0.0670345	3.25087
		ETC17	13	0.553312	0.0628661	66.3344	6.17167	0.336007	0.032972	4.56357
		ETC17	14	0.554597	0.133552	59.5709	2.94634	0.476321	0.0344065	3.40495
		ETC17	15	0.623441	0.11819	60.9314	8.98111	0.315209	0.153079	3.59793
		ETC17	16	0.552708	0.0616748	62.8982	2.60751	0.341894	0.049731	3.90803
		ETC17	17	0.679153	0.0975328	64.0231	3.48593	0.285519	0.0577658	4.10481
		ETC17	18	0.526397	0.0763925	60.8507	4.35619	0.409937	0.0361039	3.58603
		ETC17	19	0.527222	0.111389	60.807	2.22454	0.457903	0.053155	3.5796
		ETC17	20	0.365105	0.0993492	60.0108	4.27024	0.473374	0.0440774	3.4656
		ETC17	21	0.36727	0.0838479	53.6709	2.65926	0.325207	0.0140364	2.71978
		ETC17	22	0.492542	0.0488765	60.3323	4.74266	0.448487	0.0829932	3.51098
		ETC17A	23	0.49948	0.0693794	67.916	1.94838	0.369595	0.0397637	4.92937
		ETC17A	24	0.657139	0.101868	60.1158	3.11759	0.608219	0.118927	3.48032
		ETC17A	25	0.646169	0.0661335	63.3015	0.900952	0.433801	0.115319	3.97681
		ETC17B	26	0.776495	0.13037	67.8607	3.45687	0.300153	0.0347997	4.91573
		ETC17B	27	0.762639	0.0735733	67.8728	2.22614	0.239786	0.0383065	4.9187
		ETC18	1	0.524234	0.166884	69.0496	13.7414	0.514113	0.379589	5.22369
		ETC18	2	0.543921	0.117964	65.8354	6.19593	0.374439	0.102341	4.45757
		ETC18A	3	0.38303	0.0976698	65.028	10.8396	0.319594	0.171044	4.29448
		ETC18A	4	0.561089	0.0551613	72.4292	13.7465	0.443601	0.351213	6.31595
		ETC19	1	0.498312	0.0524516	77.5068	2.32567	0.157887	0.0396326	9.02647
		ETC19	2	0.430335	0.099248	81.7916	6.2381	0.0696031	0.0550018	13.8645
		ETC19	3	0.468678	0.103792	68.1141	4.04637	0.326245	0.0625685	4.97868
		ETC19	4	0.452201	0.0710905	77.3409	2.19575	0.291817	0.0623713	8.90429
		ETC19	5	0.358259	0.0616388	71.3863	5.56274	0.222085	0.0621654	5.93818
		ETC2	1	0.294439	0.0475108	56.4618	2.70709	0.509194	0.0595036	3.0173
		ETC2	2	0.80911	0.181126	55.2605	8.48865	0.437837	0.135454	2.88412
		ETC2	3	0.258511	0.0859934	54.7357	8.45284	0.499776	0.0920545	2.82844
		ETC2	5	0.234568	0.0549241	53.9759	19.5949	0.577434	0.288251	2.75033
		ETC2	6	0.235752	0.0409376	59.9275	7.37098	0.34437	0.10948	3.454
		ETC2	7	0.909144	0.124342	60.1805	1.57048	0.409432	0.0147003	3.48945
		ETC2	8	0.250574	0.0337178	61.7935	8.39272	0.302224	0.08074	3.72897
		ETC2	9	0.259903	0.0809562	61.3495	16.6368	0.494414	0.304288	3.66057
		ETC20	1	0.598647	0.101989	55.7695	3.09625	0.416364	0.0370557	2.93954
		ETC20	2	0.702215	0.059931	68.0343	0.18901	0.317401	0.0202708	4.95871
		ETC20	3	0.652983	0.11383	58.3437	2.10734	0.35394	0.0410928	3.2438
		ETC20	4	0.536477	0.0607061	64.6212	5.09699	0.269247	0.0432662	4.21601
		ETC20	5	0.646579	0.0689419	62.9713	1.96473	0.374651	0.019637	3.92036
		ETC20	6	0.639379	0.0597745	58.5522	4.0868	0.347103	0.0632057	3.27039
		ETC20	7	0.611095	0.0675796	57.7394	6.13658	0.405259	0.0832078	3.16851
		ETC20	8	0.639933	0.0365859	61.8467	4.81477	0.397318	0.0745867	3.73729
		ETC20	9	0.592777	0.127607	71.2799	3.83788	0.240619	0.086941	5.90194
		ETC20	10	0.448412	0.0432319	68.2647	0.49432	0.283456	0.0279401	5.01678
		ETC21	1	0.449959	0.0470964	70.2755	5.12427	0.26837	0.0967169	5.57825
		ETC21	2	0.317314	0.0482967	66.3481	6.56963	0.261291	0.100943	4.56653
		ETC21	3	0.764476	0.144239	65.2393	3.8598	0.221118	0.0368002	4.33621
		ETC21	4	0.506447	0.0558011	63.3495	9.05646	0.287498	0.133124	3.98514
		ETC21	5	0.534921	0.0332044	70.3853	10.5744	0.213682	0.162926	5.6121
		ETC21	6	0.745051	0.064574	60.5347	9.87562	0.29786	0.118701	3.53999
		ETC21	7	0.539039	0.0692573	70.7695	9.80746	0.235147	0.207476	5.73341
		ETC21	8	0.370208	0.0168188	66.261	9.27339	0.273361	0.153246	4.54771
		ETC21	9	0.389811	0.0279613	59.9222	3.02231	0.393948	0.0512191	3.45327
		ETC21	10	0.334259	0.0505335	53.1398	3.76321	0.552654	0.0380726	2.66761
		ETC21	11	0.527549	0.0738309	69.8976	8.80511	0.295862	0.158976	5.46454
		ETC21	12	0.375148	0.0583986	65.4533	2.55565	0.275554	0.0289359	4.37914
		ETC21	13	0.312192	0.113677	61.8875	7.61777	0.30919	0.113576	3.7437
		ETC21	14	0.367484	0.0958566	62.4629	3.59883	0.29053	0.0437925	3.8359
		ETC21	15	0.464083	0.0686413	64.7864	5.28995	0.326363	0.0682415	4.24759
		ETC21	16	0.413642	0.0574124	63.2294	8.33395	0.483795	0.158766	3.96437
		ETC21	17	0.536074	0.0895666	71.9049	7.74274	0.340574	0.112712	6.12078
		ETC21	18	0.414948	0.0946557	72.6809	11.5499	0.188977	0.117039	6.41373
		ETC21	19	0.291812	0.0479918	66.3932	2.18504	0.313638	0.0564486	4.57635
		ETC21	20	0.446002	0.0661486	67.8994	5.93019	0.285998	0.0755795	4.92527
		ETC21	21	0.438687	0.0480826	60.2518	4.66796	0.362272	0.0565777	3.49953
		ETC21	22	0.46631	0.067395	63.4141	4.50106	0.356066	0.0629763	3.99636
		ETC21	23	0.484999	0.0359375	56.7258	1.80687	0.396793	0.031994	3.0477
		ETC2A	4	0.458325	0.161944	56.6948	8.89458	0.501261	0.154082	3.0441
		ETC3	1	0.422121	0.13237	56.6283	7.42096	0.501684	0.140654	3.03642
		ETC3A	2	0.322357	0.0284152	57.3229	3.90134	0.475216	0.0823277	3.11806
		ETC3A	3	0.764991	0.263918	54.2189	6.98489	0.462463	0.0820988	2.77499
		ETC3B	4	0.40089	0.048296	61.0155	5.47248	0.355255	0.0480769	3.61039
		ETC4	1	0.2646	0.0284373	50.7207	7.89499	0.532038	0.170196	2.44532
		ETC4	3	0.884332	0.124285	65.9728	5.00463	0.505895	0.123815	4.48634
		ETC4	6	0.316095	0.0354116	69.7756	6.09698	0.212707	0.0487341	5.42871
		ETC4	7	0.302279	0.0440121	62.9318	1.96319	0.347311	0.0172334	3.91369
		ETC4	8	0.366554	0.0577694	54.9253	10.3643	0.490697	0.187034	2.84838
		ETC4	9	0.323793	0.0824767	67.7938	9.09932	0.273971	0.128278	4.89934
		ETC4	10	0.475587	0.0679309	60.6273	8.0068	0.385662	0.164222	3.55339
		ETC4	11	0.823008	0.0937235	65.3356	5.89339	0.307673	0.133898	4.35544
		ETC4	12	0.265867	0.0506798	54.6066	0.18951	0.383652	0.0618041	2.81496
		ETC4	13	0.38016	0.0349376	60.8396	1.62464	0.401825	0.00287335	3.58439
		ETC4A	2	0.482178	0.0578927	56.0129	12.8366	0.779204	0.349696	2.96656
		ETC4A	4	0.610068	0.0907455	67.7355	7.54132	0.363393	0.169665	4.88513
		ETC4A	5	0.461052	0.124979	57.364	8.64938	0.482376	0.130094	3.12299
		ETC5	10	0.590304	0.157682	66.7341	10.8649	0.409792	0.211874	4.65156
		ETC5	11	0.880391	0.168913	65.6658	12.042	0.291867	0.12395	4.42246
		ETC5	12	0.725125	0.285784	73.8928	9.86244	0.235663	0.143487	6.92588
		ETC5	13	0.847964	0.157804	63.3037	4.70263	0.356013	0.0524216	3.9772
		ETC5	14	0.686038	0.166844	61.6652	3.10372	0.36132	0.0426174	3.70901
		ETC5	15	0.692636	0.109784	64.2481	4.0708	0.262918	0.0490658	4.14609
		ETC5	16	0.844329	0.104826	62.7867	2.77682	0.431553	0.0893136	3.88936
		ETC6	1	0.644291	0.088358	63.4909	6.64144	0.308554	0.0528165	4.00978
		ETC6	2	0.601337	0.101599	63.9064	1.36788	0.239772	0.00739006	4.08366
		ETC6	3	0.73868	0.112351	64.6696	7.01561	0.374638	0.127193	4.22524
		ETC6	4	0.778159	0.0724568	62.109	3.84417	0.370447	0.0909634	3.77878
		ETC6	5	0.598513	0.0864435	65.569	6.50894	0.292041	0.120355	4.40265
		ETC6	7	0.614165	0.0750524	62.4438	7.00772	0.264962	0.0792654	3.83277
		ETC6	8	0.757457	0.0720777	61.5637	4.4547	0.340041	0.0539542	3.69333
		ETC6	10	0.674636	0.141817	70.7848	12.8372	0.175477	0.121444	5.73832
		ETC6	11	0.521031	0.0616202	64.4263	7.56515	0.405169	0.175941	4.17924
		ETC6	12	0.726483	0.0338458	66.3647	5.43733	0.241342	0.0498084	4.57014
		ETC6	16	0.33845	0.0453366	64.6868	3.51489	0.355366	0.0406159	4.22851
		ETC6A	6	0.579635	0.0419879	63.8626	4.19306	0.33447	0.0617547	4.07578
		ETC6A	13	0.535541	0.0455808	59.5187	3.69423	0.334467	0.0910077	3.39787
		ETC6B	9	0.59688	0.0421481	63.1336	5.60199	0.329695	0.0992455	3.94795
		ETC6B	14	0.556689	0.116488	55.4096	7.02198	0.325025	0.0640046	2.9002
		ETC6B	15	0.471331	0.0363919	57.5585	3.77933	0.400799	0.094142	3.14646
		ETC7	1	0.839053	0.0432978	68.6902	2.68166	0.286552	0.0741508	5.12713
		ETC7	2	0.203614	0.0769239	66.3031	5.16012	0.221176	0.0511865	4.5568
		ETC7	3	0.390602	0.0533626	59.3899	0.632245	0.42042	0.0699182	3.38045
		ETC7	4	0.632053	0.086402	63.727	5.52595	0.290502	0.0593516	4.0515
		ETC7	5	0.381164	0.101242	72.9815	5.31933	0.187439	0.0594741	6.53416
		ETC7	6	0.291453	0.073403	61.2929	8.16498	0.387161	0.125148	3.65199
		ETC7A	7	0.545021	0.0700093	64.3696	3.18276	0.426584	0.12753	4.16865
		ETC7B	8	0.287247	0.0241297	66.5278	3.10533	0.269857	0.0538847	4.60579
		ETC7B	9	0.738982	0.1027	68.5883	3.49462	0.332514	0.0646674	5.10033
		ETC7B	10	0.567497	0.0993929	69.6708	5.31153	0.218838	0.0895168	5.39824
		ETC7B	11	0.760042	0.0522612	61.1661	2.42288	0.398355	0.0588364	3.6329
		ETC7B	12	0.239807	0.040477	47.6103	13.8337	0.49405	0.143043	2.19107
		ETC8	1	0.830006	0.0623488	63.6865	1.43382	0.331526	0.0262755	4.04429
		ETC8	2	0.930231	0.0798933	55.343	3.72336	0.344508	0.0547147	2.89301
		ETC8	3	0.705151	0.107702	60.6122	1.39675	0.306633	0.0242478	3.55119
		ETC8	4	0.466488	0.0643846	55.1571	12.045	0.462367	0.192184	2.87303
		ETC8	5	0.445939	0.0599165	66.6041	6.19137	0.232074	0.0652924	4.62263
		ETC8	6	0.578514	0.0934792	57.5468	5.44014	0.350719	0.0709231	3.14503
		ETC8	7	0.424946	0.0538195	60.7475	5.34695	0.338722	0.0885349	3.57089
		ETC8	8	0.441101	0.0693499	59.1769	3.03177	0.374342	0.030067	3.35195
		ETC8	9	0.412312	0.025024	66.6218	9.89723	0.216263	0.12389	4.62656
