# Supplementary material for: Epidermal threads reveal the origin of hagfish slime
Source: eLife. 2023 Mar 10;12:e81405. doi: 10.7554/eLife.81405 (PMC10005773; doi:10.7554/eLife.81405)
Supplement: Figure 4—source data 1. [file elife-81405-fig4-data1.xlsx]

## Sheet: Sheet1
			thread length (mm)	number of free ends
			2.315	2
			3.042	2
			2.165	1
			1.901	1
			1.868	1
			2.047	1
			1.758	1
			1.469	1
			2.112	1
			1.674	0
			2.902	0
			2.223	1
			2.231	2
			1.639	1
			2.278	1
			1.696	2
			1.758	2
