# Supplementary material for: Epidermal threads reveal the origin of hagfish slime
Source: eLife. 2023 Mar 10;12:e81405. doi: 10.7554/eLife.81405 (PMC10005773; doi:10.7554/eLife.81405)
Supplement: Figure 7—source data 1. [file elife-81405-fig7-data1.xlsx]

## Sheet: Sheet1
	mass unit: gram		experiment group	animal	slide.ID	mass_glass	mass_wet_mucus	mass_dry_mucus	mucus_mass	water_mass	water_mass_percent
			dry.skin	1	1	0.1401	0.1463	0.1421	0.0062	0.0042	0.677419
			dry.skin	1	2	0.1381	0.1427	0.1389	0.0046	0.0038	0.826087
			dry.skin	1	3	0.1372	0.1469	0.1393	0.0097	0.0076	0.783505
			dry.skin	1	4	0.1386	0.1463	0.1395	0.0077	0.0068	0.883117
			dry.skin	2	5	0.1377	0.1416	0.1387	0.0039	0.0029	0.74359
			dry.skin	2	6	0.1368	0.139	0.1375	0.0022	0.0015	0.681818
			dry.skin	2	7	0.1402	0.1434	0.1411	0.0032	0.0023	0.71875
			dry.skin	3	8	0.1365	0.142	0.138	0.0055	0.004	0.727273
			dry.skin	3	9	0.138	0.1399	0.1384	0.0019	0.0015	0.789474
			dry.skin	3	10	0.137	0.1433	0.1388	0.0063	0.0045	0.714286
			dry.skin	3	11	0.1414	0.1477	0.1435	0.0063	0.0042	0.666667
			wet.skin	1	1	0.137	0.1512	0.1379	0.0142	0.0133	0.93662
			wet.skin	1	2	0.1366	0.153	0.1373	0.0164	0.0157	0.957317
			wet.skin	1	4	0.1379	0.1578	0.1395	0.0199	0.0183	0.919598
			wet.skin	2	5	0.1403	0.1551	0.1412	0.0148	0.0139	0.939189
			wet.skin	2	6	0.1401	0.1562	0.1411	0.0161	0.0151	0.937888
			wet.skin	2	7	0.1375	0.1484	0.1382	0.0109	0.0102	0.93578
			wet.skin	2	8	0.1608	0.1762	0.1616	0.0154	0.0146	0.948052
			wet.skin	3	9	0.1608	0.1793	0.1619	0.0185	0.0174	0.940541
			wet.skin	3	10	0.1663	0.1803	0.167	0.014	0.0133	0.95
			wet.skin	3	11	0.1616	0.1721	0.1621	0.0105	0.01	0.952381
			wet.skin	3	12	0.1414	0.1549	0.1424	0.0135	0.0125	0.925926
